# Supplementary material for: Structure-Functional Characteristics of the Svx Protein—The Virulence Factor of the Phytopathogenic Bacterium Pectobacterium atrosepticum
Source: MDPI journal article supplement (doi:10.3390/ijms23136914), 2022-06-21
Supplement: s1 [file s1]

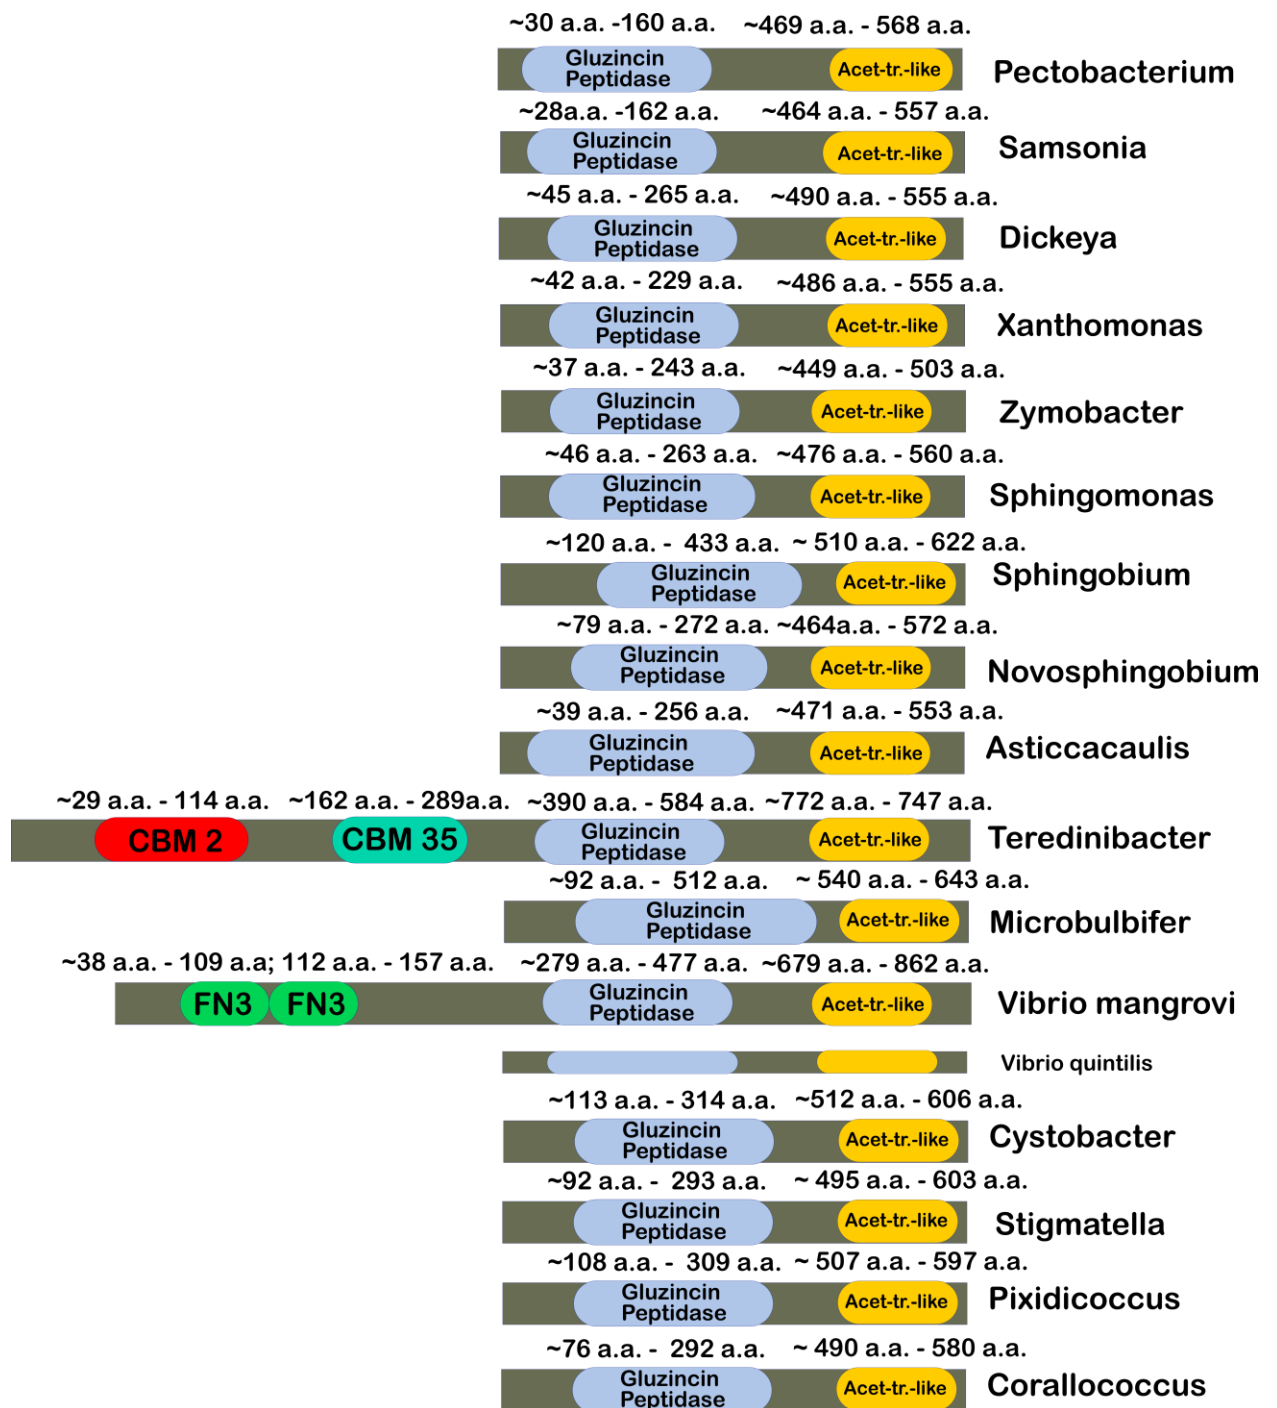

Figure S1. The possible functional domains predicted for SvX-homologues by NCBI Conserved Domain Search, HMMER and Phyre2 servers.

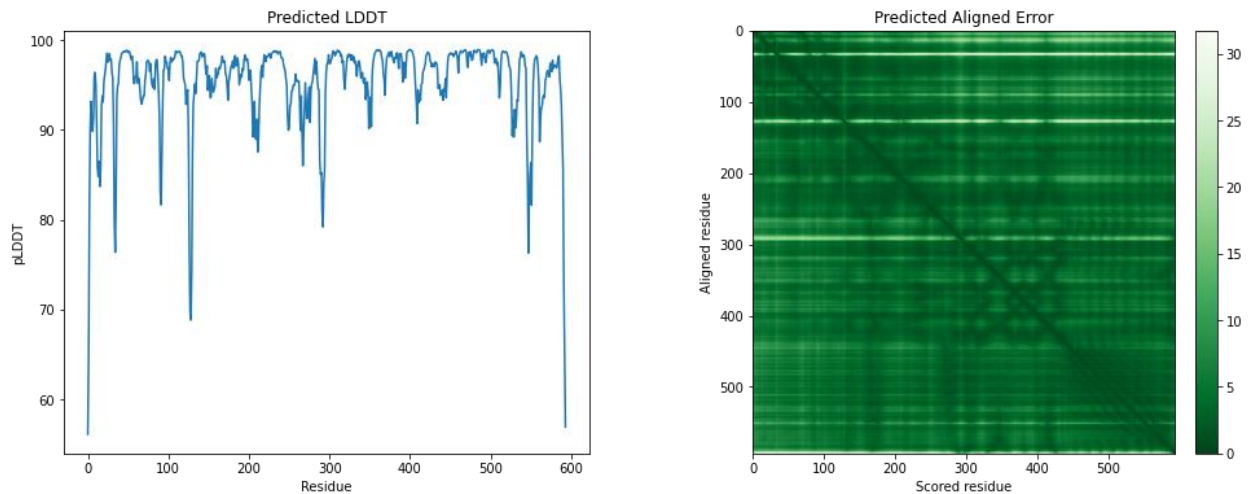

Figure S2. The results of the predicted local-distance difference test for each residue position of the Svx protein of the *Pectobacterium atrosepticum* model built by AlphaFold 2. The model confidence is high, with LDDT above 70% for the majority of the residues. The region of low confidence (slightly below 70%) is located on the loop.

|                |       |                                                               |
|----------------|-------|---------------------------------------------------------------|
| WP_011092533.1 | X118  | -----AGGG--SMGM-----WIGPASLKDNWGLAHEFTHALQGQ---               |
| ZP_06941093.1  | X1274 | VNDVAISIGAA--HSGY-PVMNASFNATS---KSLNTAPLNSWLLWHEVGHNAAEA---   |
| WP_001034562.1 | X1264 | TNDVQISIGDA--HSGY-PVMNSSFSTNS---TTLPTTPLNDWLIWHEVGHNAAE---    |
| NP_001123498.2 | X611  | VADVQISAGWM--HSGY-PIMCHLESVKEII--NEMDMRSRGVWGPVHELGHNQQRH---  |
| WP_012420550.1 | X454  | VVDRQISAGAG--HSGY-PAMATKDWNTNSIA---TGSIIHSGSWGLWHELGHNHQSP--- |
| ZP_04093101.1  | X254  | T-SPFMYANNY--LTGY-----AEDSIEFVL---DIEKFTKDGWGPWHEVGHVHHQV---  |
| WP_015834470.1 | X204  | ----YMFATNG--HMGF-----NGDAALQRL-----LTTNNGWGIWHEVGHVHHQV---   |
| WP_011590734.1 | X723  | SGGAFMNAGNG--VIGIRPG-----NQDAILAANKGWGVAHELGHVHFDTG---        |
| WP_008764444.1 | X536  | --GSYMWASDY--QIGF-----VYTYLGNILLEDNVMAAEDNAGWPAHEIGHVHQAA---  |
| XP_001330197.1 | X317  | NFDSYVPAGAFAVVGANFIQAPFSWSTAMI---NYEGAKWGWGWNVHEVGHVHHQV---   |
| XP_654508.1    | X343  | NFDQRVDAGAFAVVGWRFVTQNPSPDWAACV--GKDGLINYGNWGLPHEMNHMQGTYLK   |

  

|                |                                                            |       |
|----------------|------------------------------------------------------------|-------|
| WP_011092533.1 | --TGGFQGAGGDDYVGIWESHANMTHQMDEF--GTSAHCEMQVNYSHIYLGST--RNR | X205  |
| ZP_06941093.1  | --PFNVGAT-----EVVNNLALYMQDCHLGKMARVEQ-----DIRIAP-----      | X1361 |
| WP_001034562.1 | --PLNVPAT-----EVANNLALYMQDRYLGMNVRVAD-----DITVAP-----      | X1351 |
| NP_001123498.2 | --GWEFPHT-----TEATCNLSVYVHETV-LGIPRAQA-----HEALSP--PER     | X703  |
| WP_012420550.1 | --PFTMEGQT-----EVSNIIFSMVCEVMG-TGKDFESCW-----GGMGMP--YGM   | X545  |
| ZP_04093101.1  | --PWLSEGMG-----ETTNNIYSLAVQLAF-GNKSME-----V-DGR            | X333  |
| WP_015834470.1 | --PYTWSGGTG-----MTETVNNLYSLAVQEGF--HDRASF-----DKY          | X279  |
| WP_011590734.1 | -----GRT-----IVEVTNNMPLFFESKY-KTKTRIT-----DQNIWE--NNT      | X801  |
| WP_008764444.1 | ----INWASST-----ESSNNLFSNFIIYKLGKYKSR-----GNGLGSVATAR      | X622  |
| XP_001330197.1 | ---WGISGTG-----ETTNNVINFITYAML-TEIDATR-----QITLGG--SFN     | X409  |
| XP_654508.1    | GGNWGISNPG-----EETNNVMTSINYILY-TNIAGHR-----NQGLSG-----     | X438  |

Figure S3. The alignment of the amino acid sequence of the Svx protein of *Pectobacterium atrosepticum* (*Pba*) (NCBI ID WP\_011092533.1) with M60 family metalloproteinases of *Vibrio cholerae*: (NCBI ID ZP\_06941093.1), *Escherichia coli* (NCBI ID WP\_001034562.1); *Bacillus thuringiensis* (NCBI ID ZP\_04093101.1), *Photobacterium damela* (NCBI ID WP\_015834470.1), *Bacteroides thetaiotaomicron* (NCBI ID WP\_008764444.1), *Trichomonas vaginalis* (NCBI ID XP\_001330197.1), *Entamoeba histolytica* (NCBI ID XP\_654508.1), *Homo sapiens* (NCBI ID NP\_001123498.2), *Akkermansia muciniphila* (NCBI ID WP\_012420550.1), *Clostridium perfringens* (NCBI ID WP\_011590734.1) (Nakjang et al., 2012). The conservative zinc-binding motif HEXXH(8,28)E is colored in red and carbohydrate binding residues are coloured in green. The alignment was built using the MAFFT algorithm and the BLOSUM62 substitution matrix.
